# Supplementary material
Source: PubMed Central journal article supplement (PMC9528278)

## SUPPLEMENTAL MATERIALS

### TABLE OF CONTENTS

1. Supplemental Table 1. Survey Domains and Subdomains.
2. Supplemental Table 2. Demographic Characteristics of 631 Fellow Survey Respondents.
3. Supplemental Table 3. Stage of POCUS Program Development as reported by Fellows and Training/Associate Program Directors.
4. Supplement 4. Fellow Survey Instrument.
5. Supplement 5. Faculty Survey Instrument.
6. Supplemental Figure 1. Importance of Nephrology POCUS Topics for Nephrology Training Rated by Fellow (*left panel*) and Training/Associate Program Director (*right panels*) Respondents.

#### Supplemental Table 1. Survey Domains and Subdomains.

| Survey Domains and Subdomains                       | Number of Questions |
|-----------------------------------------------------|---------------------|
| <b>Fellow Survey</b>                                | <b>6</b>            |
| <i>Attitudes Regarding POCUS</i>                    | <b>2</b>            |
| Importance of POCUS Topics to Nephrology Training   | 1                   |
| Effectiveness of Educational Strategy               | 1                   |
| <i>POCUS Curricular Details</i>                     | <b>1</b>            |
| Level of Development of POCUS Curriculum in Program | 1                   |
| <i>Current POCUS Use and Competence</i>             | <b>3</b>            |
| Frequency of POCUS Use                              | 1                   |
| Perception of Trainee POCUS Competence              | 1                   |
| Perceived Adequacy of Instruction                   | 1                   |

|                                                     |          |
|-----------------------------------------------------|----------|
| <b>Faculty Survey</b>                               | <b>8</b> |
| <i>Attitudes Regarding POCUS</i>                    | <b>1</b> |
| Importance of POCUS Topics to Nephrology Training   | 1        |
| <i>POCUS Curricular Details</i>                     | <b>6</b> |
| Level of Development of POCUS Curriculum in Program | 1        |
| Topics Covered in POCUS Curriculum                  | 1        |
| Structure of POCUS Curriculum                       | 1        |
| Perceived Barriers to POCUS Curriculum Development  | 1        |
| Assessment Strategies                               | 1        |
| Training Background of POCUS Instructor             | 1        |
| <i>Current POCUS Use and Competence</i>             | <b>1</b> |
| Perception of Trainee POCUS competence              | 1        |

**Supplemental Table 2. Demographic Characteristics of 631 Fellow Survey Respondents\***

| <b>Variable</b>                                         | <b>Value<sup>†</sup></b> |
|---------------------------------------------------------|--------------------------|
| <i>Age in Years (Range)</i>                             | 33.7 (28–59)             |
| <i>Ethnicity of Hispanic, Latino, Spanish Origin</i>    | 69 (11%)                 |
| <i>Race</i>                                             |                          |
| American Indian or Alaska Native                        | 1 (0%)                   |
| East Asian (e.g., China, Japan, South Korea, Taiwan)    | 48 (8%)                  |
| South Asian (e.g., India, Pakistan, Sri Lanka)          | 204 (32%)                |
| Southeast Asian (e.g., Philippines, Vietnam, Singapore) | 31 (5%)                  |
| Pacific Islander                                        | 0                        |
| Black or African American                               | 28 (4%)                  |
| White                                                   | 216 (34%)                |
| Other                                                   | 82 (13%)                 |
| NA                                                      | 21 (3%)                  |
| <i>Medical School Classification</i>                    |                          |

|                                               |           |
|-----------------------------------------------|-----------|
| United States medical school—Allopathic (MD)  | 153 (24%) |
| United States medical school—Osteopathic (DO) | 79 (13%)  |
| Canadian medical school—Allopathic (MD)       | 3 (0%)    |
| Canadian medical school—Osteopathic (DO)      | 1 (0%)    |
| United States medical school—Off Shore        | 58 (9%)   |
| International medical school—Europe           | 28 (4%)   |
| International medical school—Middle East      | 49 (8%)   |
| International medical school—Asia             | 172 (27%) |
| International medical school—Latin America    | 50 (8%)   |
| International medical school—Africa           | 18 (3%)   |
| NA                                            | 20 (3%)   |

*Current Gender Identity*

|                       |           |
|-----------------------|-----------|
| Man                   | 375 (59%) |
| Woman                 | 232 (37%) |
| Genderqueer           | 2 (0%)    |
| Gender non-binary     | 0         |
| Gender non-conforming | 2 (0%)    |
| Prefer not to answer  | 1 (0%)    |
| NA                    | 19 (0%)   |

\*NA = not available.

†Excepting respondent age, values are presented as N (%).

**Supplemental Table 3. Stage of POCUS Program Development as reported by Fellows and Training/Associate Program Directors.**

| Parameter                                      | Fellows<br>(N=631) <sup>†</sup> | Faculty<br>(N=84) <sup>†</sup> |
|------------------------------------------------|---------------------------------|--------------------------------|
| <i>Presence of POCUS Curriculum in Program</i> | <i>N=631</i>                    | <i>N=84</i>                    |

|                                                                                                                                                                                |           |           |
|--------------------------------------------------------------------------------------------------------------------------------------------------------------------------------|-----------|-----------|
| POCUS Curriculum is Established                                                                                                                                                | 240 (38%) | 19 (23%)* |
| No Presence of POCUS Curriculum in Training Program                                                                                                                            | 382 (61%) | —         |
| No answer                                                                                                                                                                      | 9 (1%)    | —         |
| POCUS Curriculum is in Development                                                                                                                                             | —         | 32 (38%)  |
| No POCUS Curriculum is Established, but there is Interest in Developing One                                                                                                    | —         | 30 (36%)  |
| No POCUS Curriculum is Established, and there is No Interest in Developing One                                                                                                 | —         | 3 (4%)    |
| — = question was not included in cohort survey.                                                                                                                                |           |           |
| *p=0.004 comparing fellow to faculty response.                                                                                                                                 |           |           |
| †Lowercase “n” values indicate the total number of respondents for each question section. Values are presented as number of respondents (% of per-question respondent totals). |           |           |

#### Supplement 4. Fellow Survey Instrument.

##### 1. How old are you?

[OPEN TEXT]

##### 2. Are you Hispanic, Latina/o, or of Spanish origin?

- a. Yes
- b. No

##### 3. What is your race?

- a. American Indian or Alaska Native
- b. East Asian (e.g., China, Japan, South Korea, Taiwan)
- c. South Asian (e.g., India, Pakistan, Sri Lanka)
- d. Southeast Asian (e.g., Philippines, Vietnam, Singapore)
- e. Pacific Islander
- f. Black or African American
- g. White
- h. Other

##### 4. How would you classify the medical school from which you graduated?

- a. United States medical school—Allopathic (MD)

- b. United States medical school—Osteopathic (DO)
- c. Canadian medical school—Allopathic (MD)
- d. Canadian medical school—Osteopathic (DO)
- e. United States medical school—Off Shore
- f. International medical school—Europe
- g. International medical school—Middle East
- h. International medical school—Asia
- i. International medical school—Latin America
- j. International medical school—Africa

**5. What is your current gender identity?**

- a. Man
- b. Woman
- c. Genderqueer
- d. Gender non-binary
- e. Gender non-conforming
- f. Prefer not to answer

**6. Point-of-care ultrasound (POCUS) is defined as the use of portable ultrasonography at a patient's bedside for diagnostic and therapeutic purposes. How would you rate the importance of these POCUS topics to nephrology training?**

**1 = Very Important**

**2 = Somewhat Important**

**3 = Neutral**

**4 = Somewhat Unimportant**

**5 = Very Unimportant**

- a. Basic Ultrasound Principles and Knobology
- b. Kidney Ultrasound
- c. Cardiac Imaging
- d. Lung Ultrasound
- e. Diagnostic—AV Access Imaging
- f. Diagnostic—PD Access Imaging
- g. Procedure—Central Venous Access Imaging
- h. Procedure—Ultrasound-Guided AV-Access Cannulation
- i. Procedure—Kidney Biopsy

**7. Is POCUS incorporated in your fellowship program curriculum?**

- a. Yes [**Go to Question 8**]
- b. No [**EXIT SURVEY**]

**8. Please rank the effectiveness of the following educational strategies for POCUS training from 1 to 5, with 1 being very effective.**

**1 = Very Effective**

**2 = Effective**

**3 = Neutral**

**4 = Somewhat Ineffective**

**5 = Very Ineffective**

- a. Lectures
- b. Online Modules
- c. Independent Scanning
- d. Guided Scanning with Instructor
- e. Simulated Patients

**9. How often do you incorporate POCUS in your daily clinical activities?**

- a. Never
- b. <1 time per Month
- c. ≥1 time per Month
- d. ≥1 time per Week
- e. ≥1 time per Day

**10. I received adequate instruction to independently perform POCUS in general nephrology practice.**

- a. Strongly Disagree
- b. Disagree
- c. Neutral
- d. Agree
- e. Strongly Agree

**11. Upon completion of nephrology fellowship I will be competent to independently perform POCUS in general nephrology practice.**

- a. Strongly Disagree
- b. Disagree
- c. Neutral
- d. Agree
- e. Strongly Agree



**Supplement 5. Faculty Survey Instrument.**

**1. Point of care ultrasound (POCUS) is defined as the use of portable ultrasonography at a patient's bedside for diagnostic and therapeutic purposes. How would you rate the importance of these POCUS topics to nephrology training?**

| Topic                                              | Very unimportant | Somewhat unimportant | Neutral | Somewhat important | Very Important | I don't know |
|----------------------------------------------------|------------------|----------------------|---------|--------------------|----------------|--------------|
| Basic ultrasound principles and knobology          |                  |                      |         |                    |                |              |
| Kidney ultrasound                                  |                  |                      |         |                    |                |              |
| Cardiac imaging                                    |                  |                      |         |                    |                |              |
| Lung ultrasound                                    |                  |                      |         |                    |                |              |
| Diagnostic arteriovenous access imaging            |                  |                      |         |                    |                |              |
| Diagnostic peritoneal dialysis access imaging      |                  |                      |         |                    |                |              |
| Procedure: central venous access                   |                  |                      |         |                    |                |              |
| Procedure: ultrasound-guided AV-access cannulation |                  |                      |         |                    |                |              |
| Procedure: Kidney biopsy                           |                  |                      |         |                    |                |              |

**2. At our fellowship program:**

- a. POCUS Curriculum is Established **[Go to Question 3]**
- b. POCUS Curriculum is in Development **[Go to Question 3]**
- c. No POCUS Curriculum is Established, But There's Interest in Developing One **[Go to Question 3]**
- d. No POCUS curriculum is Established, And There's No Interest in Developing One **[EXIT SURVEY]**

**3. Which of the following topics does your POCUS curriculum cover? Select all that apply.**

- a. Basic Ultrasound Principles and Knobology
- b. Kidney Ultrasound
- c. Cardiac Imaging
- d. Lung Ultrasound
- e. Diagnostic—AV Access Imaging
- f. Diagnostic—PD Access Imaging
- g. Procedure—Central Venous Access
- h. Procedure—Ultrasound-Guided AV-Access Cannulation
- i. Procedure—Kidney Biopsy
- j. Other: \_\_\_\_\_

**4. How is POCUS training structured in your fellowship program? Select all that apply.**

- a. Intensive block experience
- b. Longitudinal training experience
- c. Other: \_\_\_\_\_

**5. What barrier(s) have you encountered in implementing a POCUS curriculum at your training program? Select all that apply.**

- a. Ultrasound machine access
- b. Fear of missing an important diagnosis
- c. Financial concerns
- d. Inability to bill
- e. No Data Supporting POCUS Expedites Care
- f. No Interest/Support from Division/Department
- g. No Time for Curriculum Development
- h. No trained faculty
- i. Opposition from other ultrasound-trained physicians
- j. Ultrasound studies are immediately available
- k. None
- l. Other: \_\_\_\_\_

**6. What is the background/training of POCUS instructors that teach your fellows? Choose all that apply**

- a. Nephrology
- b. Cardiology
- c. Emergency Medicine
- d. Pulmonary/Critical Care
- e. Ultrasound technologist
- f. Hospital Medicine
- g. Other: \_\_\_\_\_

**7. What/Which methods does your training program use to assess fellow competency in**

**POCUS? Choose all that apply**

- a. Direct Observation
- b. Knowledge test
- c. OSCE (Objective Structured Clinical Examination)
- d. POCUS Portfolio (collected ultrasound video clips for remote review)
- e. Other: \_\_\_\_\_

**8. My graduating fellows are competent to independently perform POCUS in the context of general nephrology practice.**

- a. Strongly disagree
- b. Disagree
- c. Neutral
- d. Agree
- e. Strongly agree

**Supplemental Figure 1. Importance of Nephrology POCUS Topics for Nephrology Training Rated by Fellow (*left panel*) and Training/Associate Program Director (*right panels*) Respondents.**

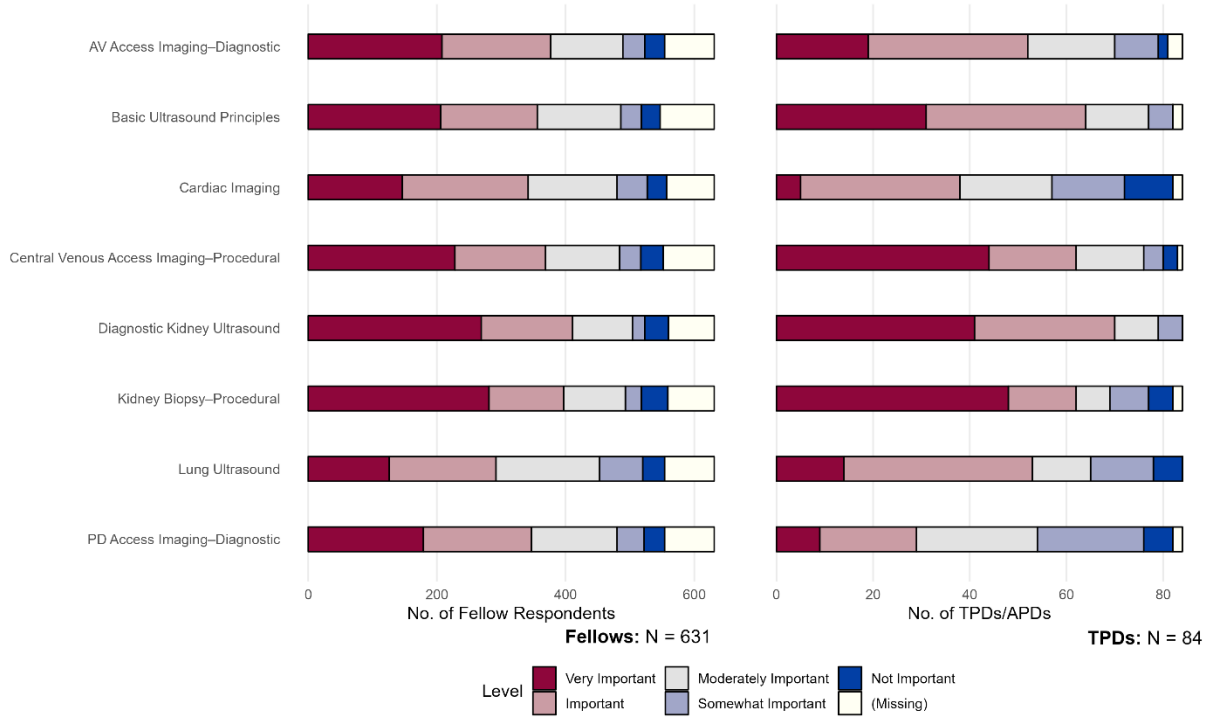

Supplement: CJN.01850222SupplementaryData1.pdf [file CJN.01850222SupplementaryData1.pdf]
